# Supplementary material for: Recyclable, bifunctional composites of perovskite type N-CaTiO3 and reduced graphene oxide as an efficient adsorptive photocatalyst for environmental remediation
Source: Royal Society of Chemistry journal article supplement (doi:10.1039/c7qm00362e), 2017-01-01
Supplement: c7qm00362e1.pdf [file c7qm00362e1.pdf]

## Supporting Information

# Recyclable, Bifunctional Composites of Perovskite Type N-CaTiO<sub>3</sub> and Reduced Graphene Oxide as an Efficient Adsorptive Photocatalyst for Environmental Remediation

Ashish Kumar, Suneel Kumar, Ashish Bahuguna, Ajay Kumar,

Vipul Sharma and Venkata Krishnan<sup>a\*</sup>

School of Basic Sciences and Advanced Materials Research Center, Indian Institute of Technology Mandi, Kamand, Mandi 175005, Himachal Pradesh, India.

Email: [vkn@iitmandi.ac.in](mailto:vkn@iitmandi.ac.in)

| Page no | Contents                                                                                                                                           |
|---------|----------------------------------------------------------------------------------------------------------------------------------------------------|
| S2      | XRD pattern of GO and RGO ( <b>Figure S1</b> ).                                                                                                    |
| S3      | Raman spectra of GO and RGO ( <b>Figure S2</b> ).                                                                                                  |
| S4      | Elemental mapping images of CT and NCT ( <b>Figure S3 and S4</b> ).                                                                                |
| S5      | Plot of transformed Kubelka-Munk function vs the energy of light for CT and NCT ( <b>Figure S5</b> ).                                              |
| S6      | Time dependent absorption spectra of MB degradation in dark and light ( <b>Figure S6</b> )                                                         |
| S7      | Time dependent absorption spectra of TBZ degradation in dark and light ( <b>Figure S7</b> )                                                        |
| S8      | Summary of kinetic data of photocatalytic degradation of MB using all prepared photocatalysts under visible light irradiation ( <b>Table S1</b> ). |
| S9      | Adsorption/degradation study of MB over NCTG20 composite ( <b>Figure S8</b> ).                                                                     |
| S10     | Summary of adsorption parameters ( <b>Table S2</b> ).                                                                                              |
| S11     | Raman spectra of MB and recovered catalyst after third cycle ( <b>Figure S9</b> ).                                                                 |
| S12-S14 | Mass spectra of degraded MB solution by NCTG20 composite under visible light ( <b>Figure S10</b> ).                                                |

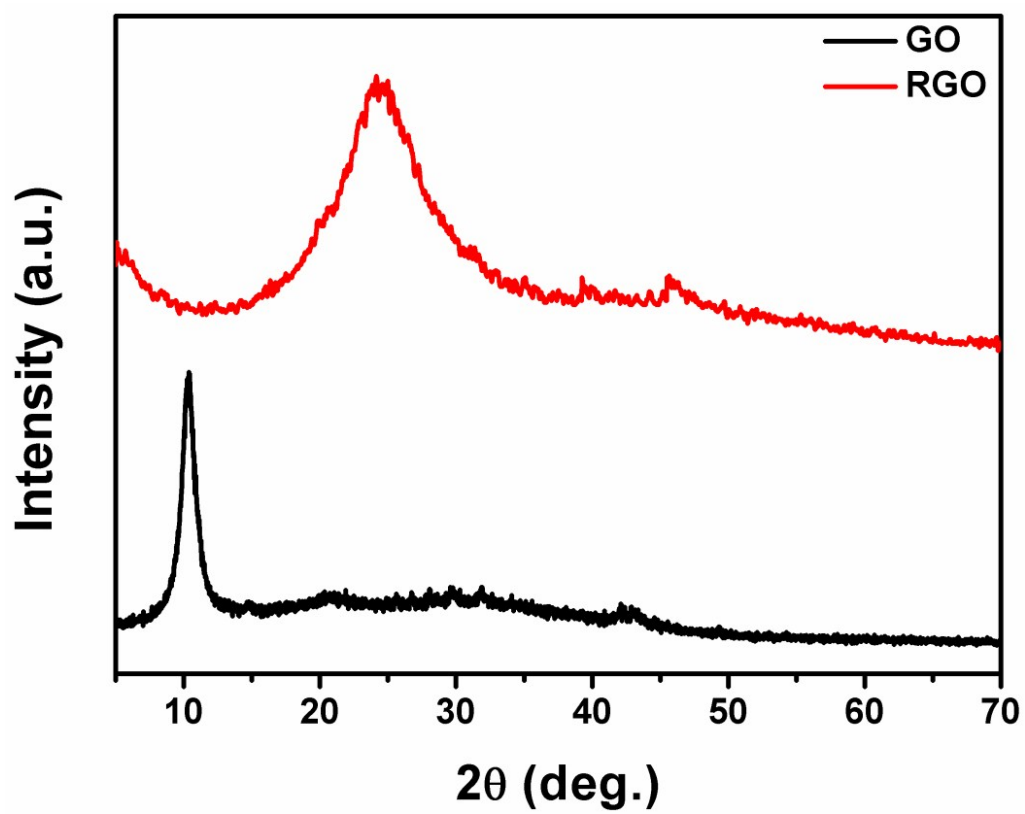

**Figure S1.** XRD pattern of GO and RGO

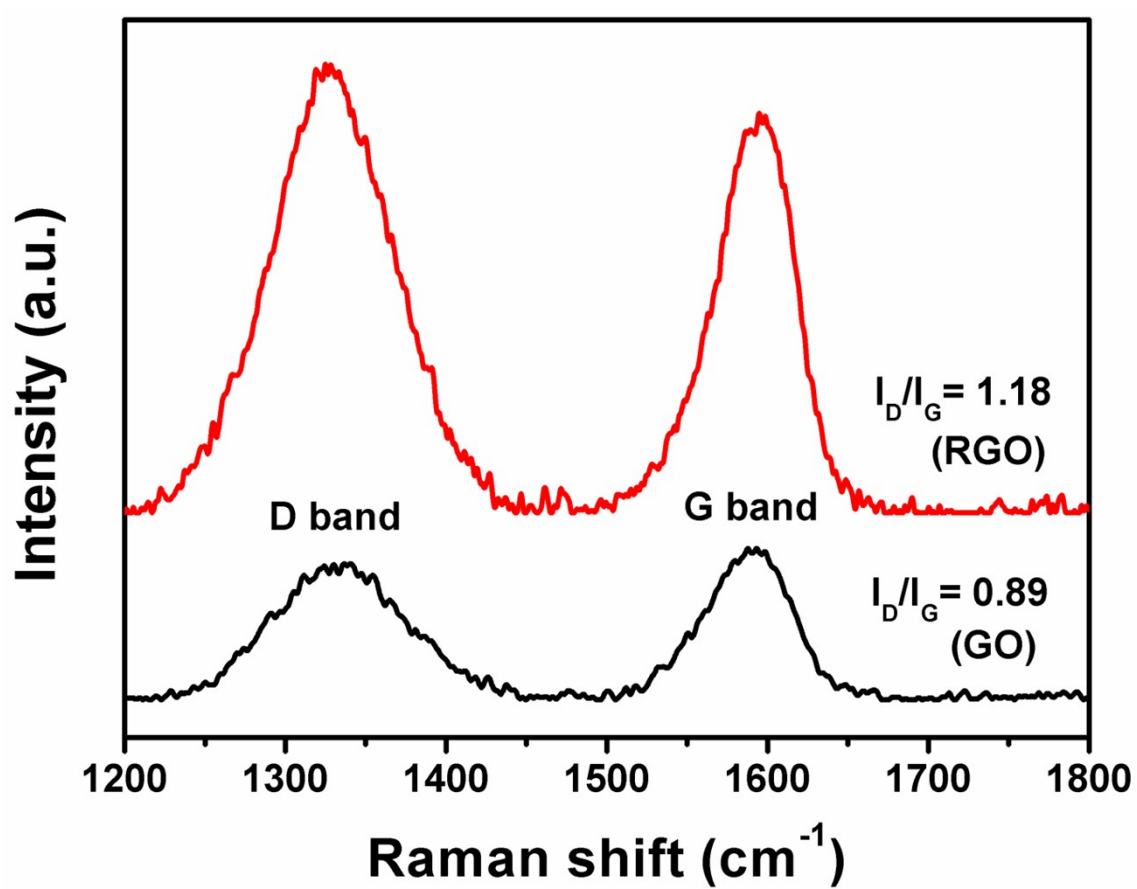

**Figure S2.** Raman spectra of GO and RGO

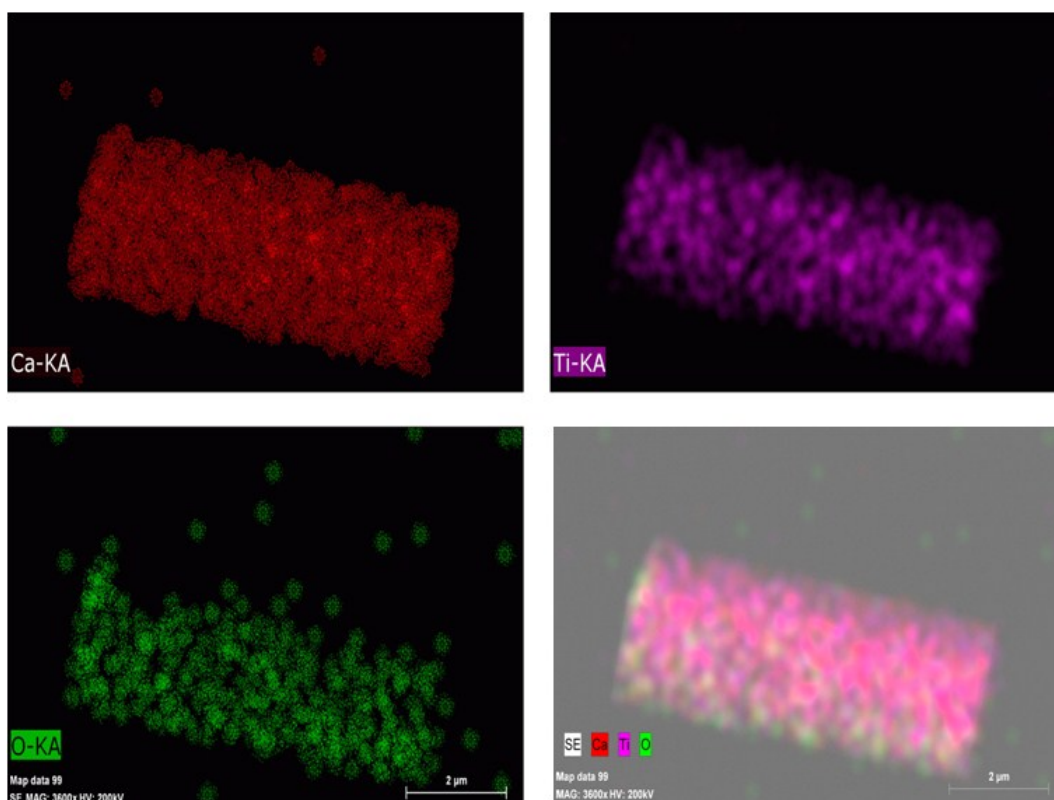

**Figure S3.** Elemental mapping of CT.

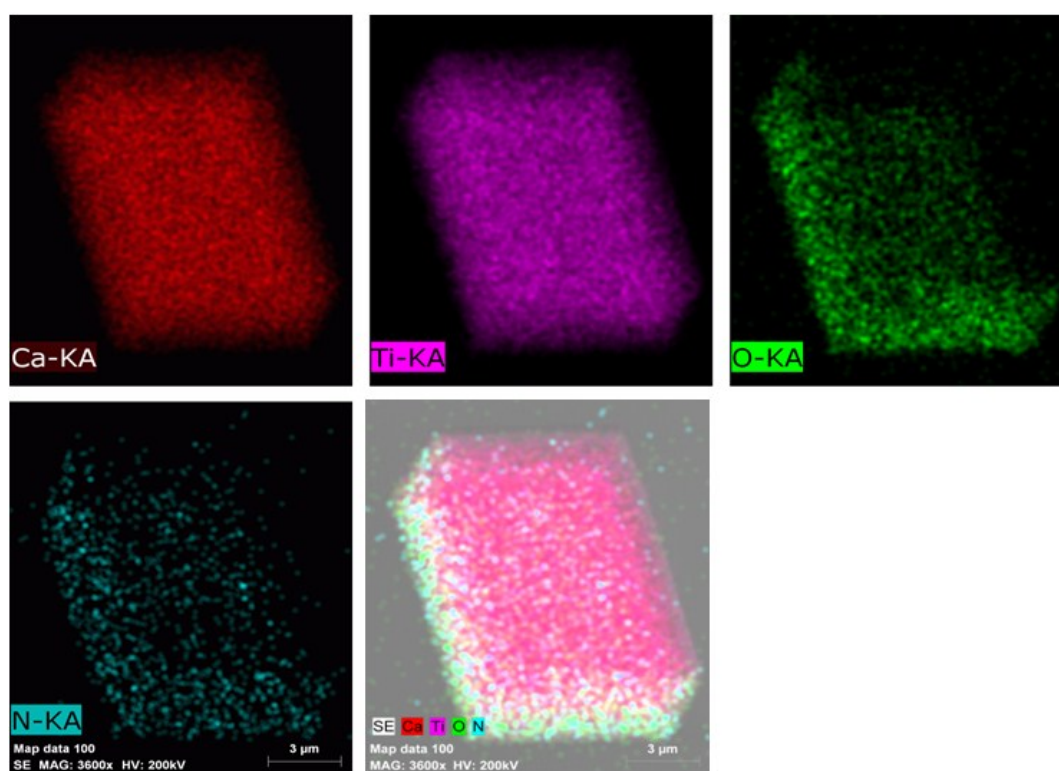

**Figure S4.** Elemental mapping of NCT.

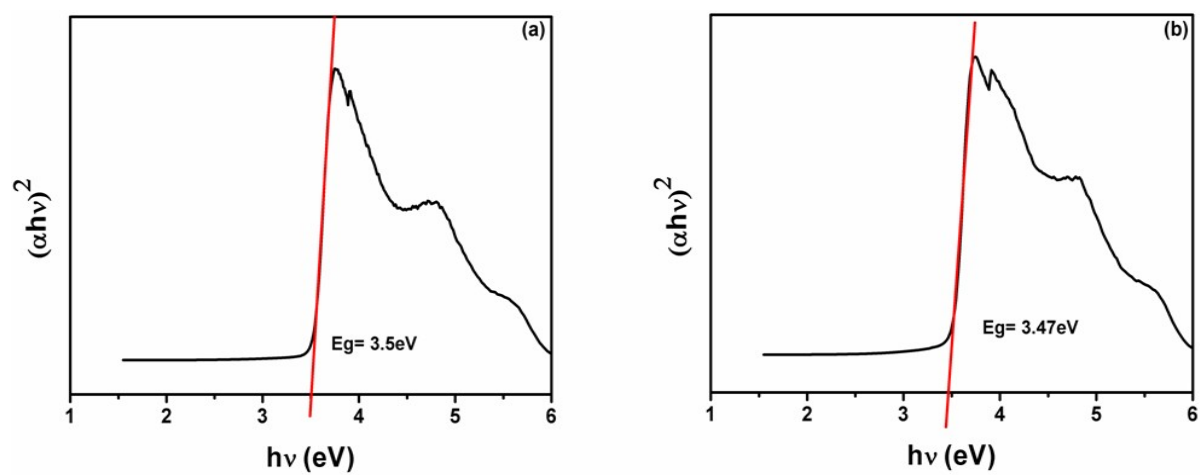

**Figure S5.** Plot of transformed Kubelka-Munk function vs the energy of light: (a) CT (b) NCT

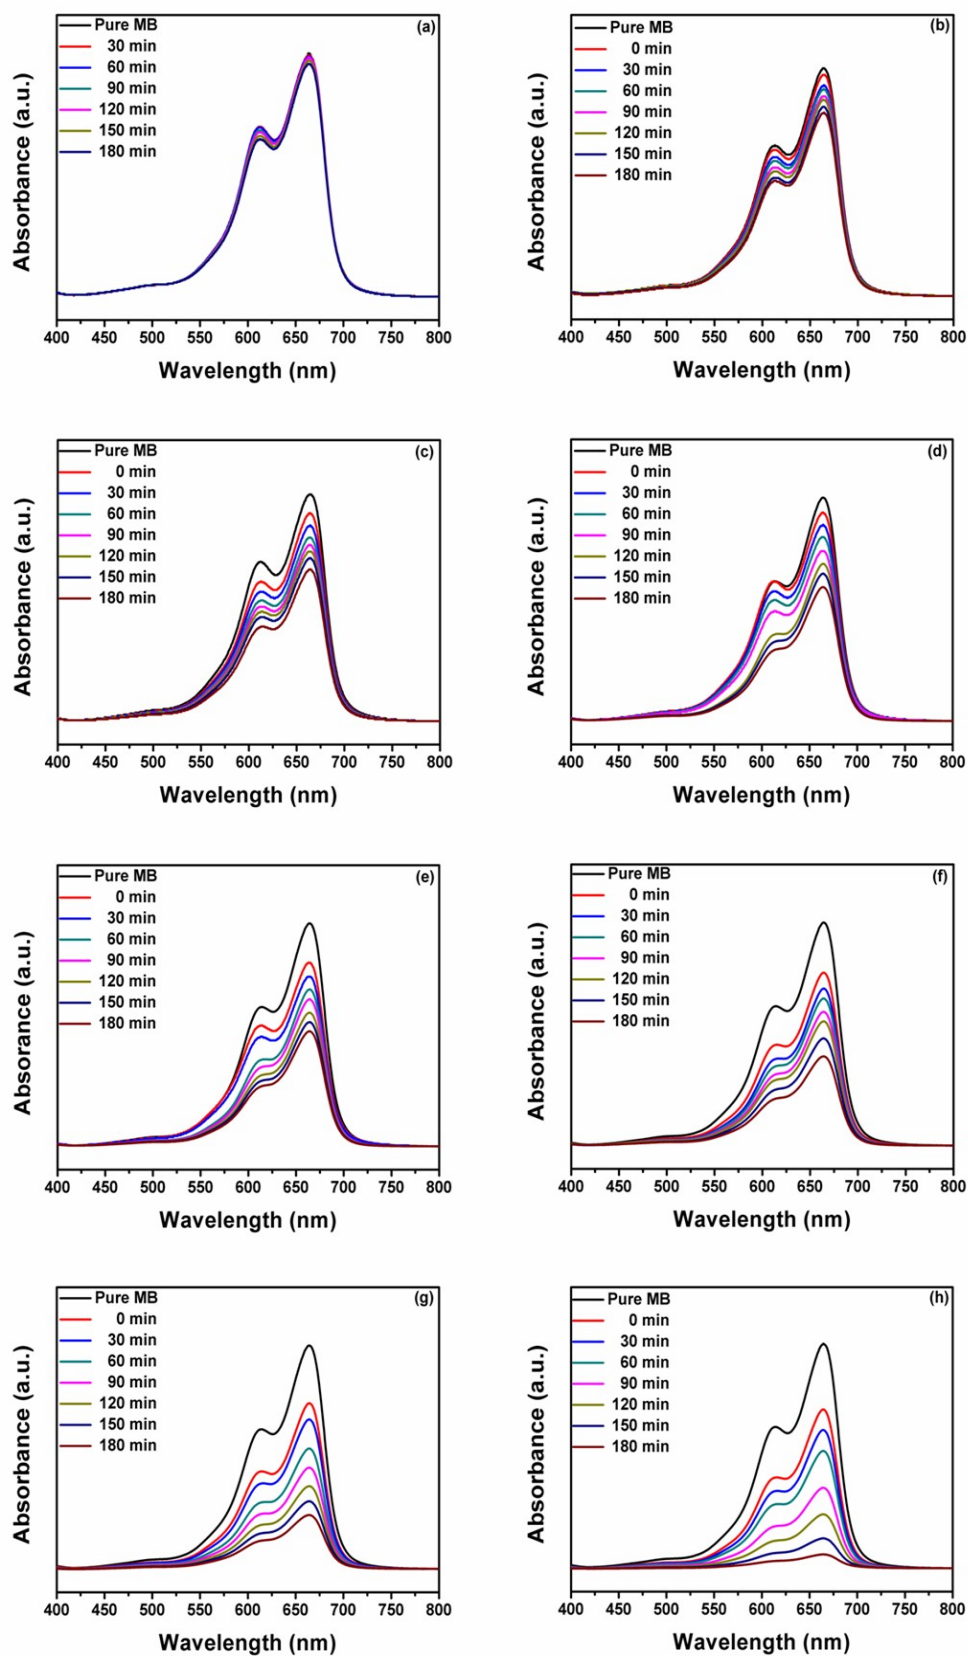

**Figure S6.** Time dependent absorption spectra of MB degradation: (a) Pure MB (b) CT (c) NCT (d) NCTG01 (e) NCTG03 (f) NCTG05 (g) NCTG10 and (h) NCTG20.

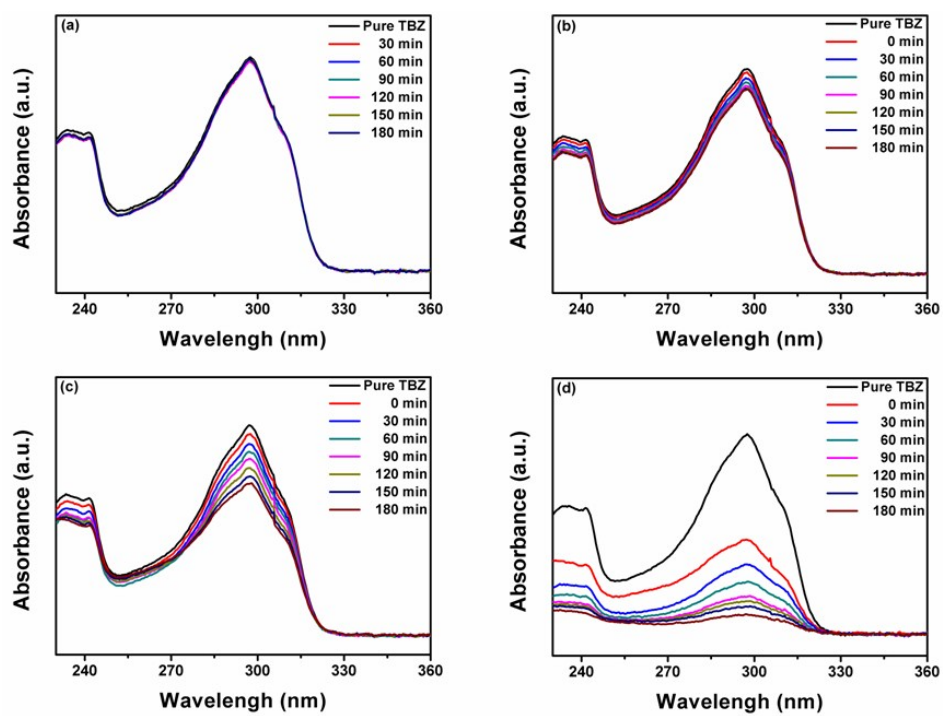

**Figure S7.** Time dependent absorption spectra of TBZ degradation: (a) Pure TBZ (b) CT (c) NCT and (d) NCTG20.

**Table S1.** Summary of kinetic data of photocatalytic degradation of MB using all prepared photocatalysts under visible light irradiation

| Sl. No. | Photocatalyst | Rate constant $k$<br>( $\text{min}^{-1}$ ) | $t_{1/2}$ (min) | $R^2$  |
|---------|---------------|--------------------------------------------|-----------------|--------|
| 1       | Bare MB       | 0.0002                                     | 2898.14         | 0.9300 |
| 2       | CT            | 0.0009                                     | 766.34          | 0.9719 |
| 3       | NCT           | 0.0016                                     | 420.00          | 0.9899 |
| 4       | NCTG01        | 0.0022                                     | 308.00          | 0.9805 |
| 5       | NCTG03        | 0.0028                                     | 250.18          | 0.9954 |
| 6       | NCTG05        | 0.0036                                     | 194.66          | 0.9808 |
| 7       | NCTG10        | 0.0061                                     | 114.36          | 0.9896 |
| 8       | NCTG20        | 0.0112                                     | 61.88           | 0.8838 |

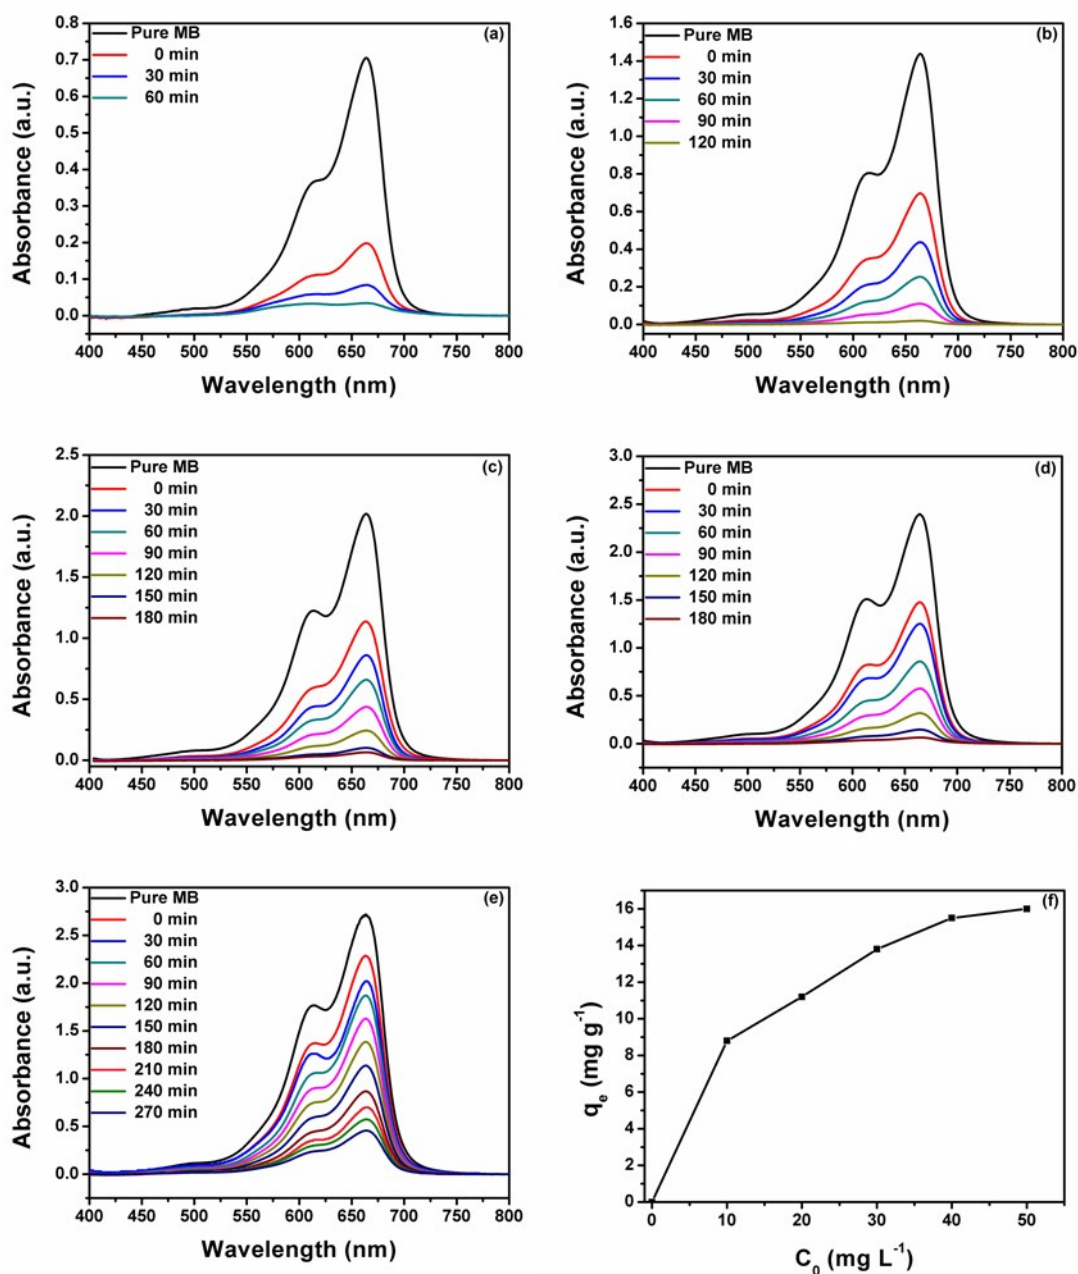

**Figure S8.** Adsorption/degradation by NCTG20 composite: (a)  $1 \times 10^{-5}$  M (b)  $2 \times 10^{-5}$  M (c)  $3 \times 10^{-5}$  M (d)  $4 \times 10^{-5}$  M (e)  $5 \times 10^{-5}$  M MB and (f) dye adsorption isotherm of MB on NCTG20 composite.

**Table S2.** Summary of adsorption parameters

| Langmuir model |         |       | Freundlich model |        |       |
|----------------|---------|-------|------------------|--------|-------|
| $q_m$          | $K_L$   | $R^2$ | $K_f$            | $1/n$  | $R^2$ |
| 16.37          | 0.00631 | 0.985 | 8.234            | 0.1842 | 0.936 |

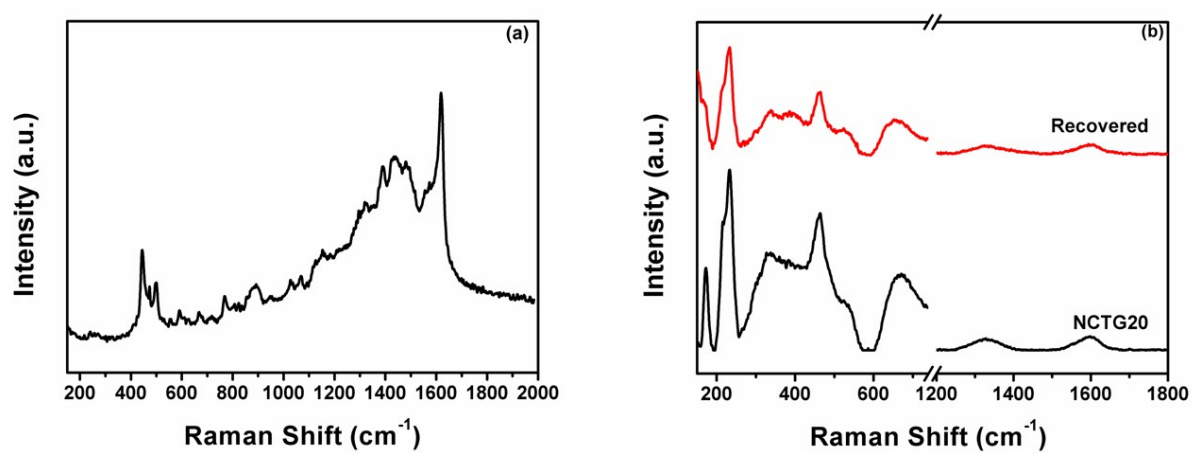

**Figure S9.** Raman spectra of MB<sup>1</sup> and recovered catalyst after third cycle

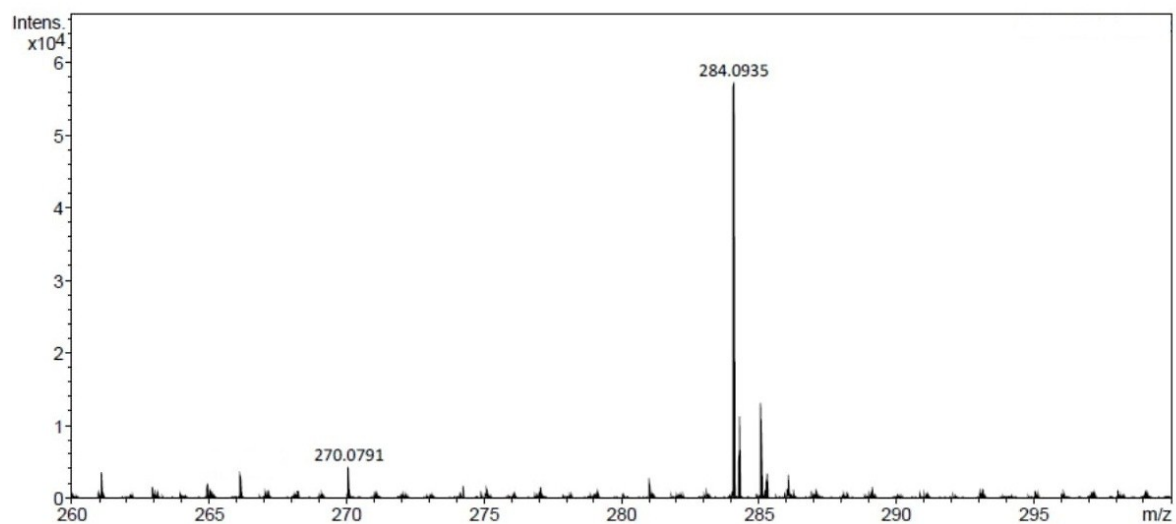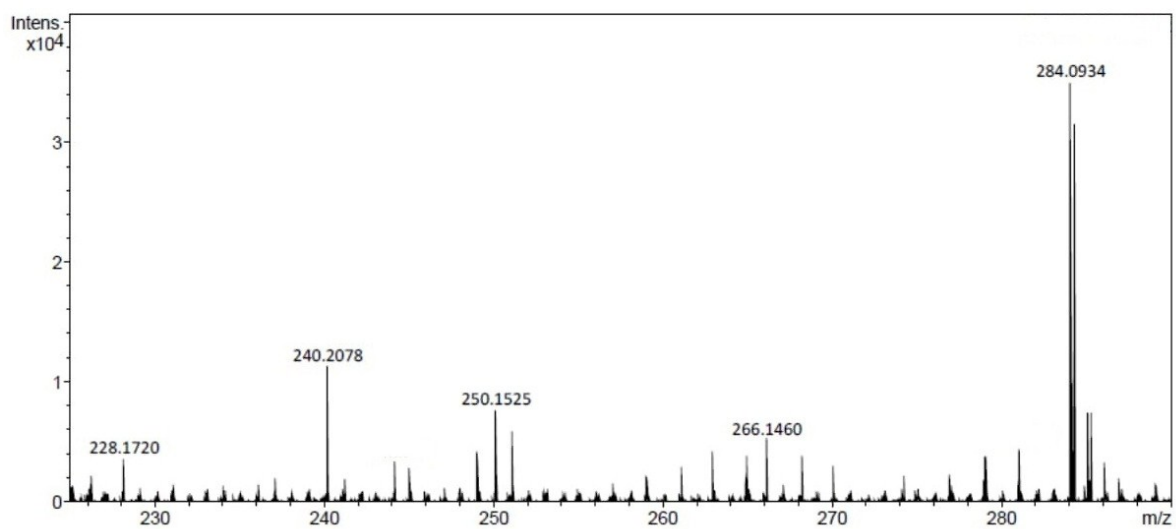

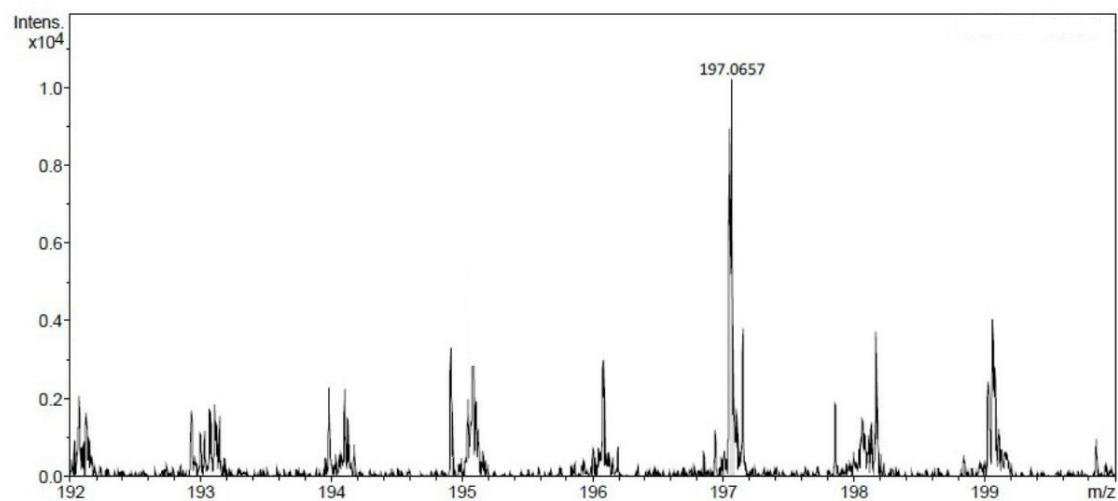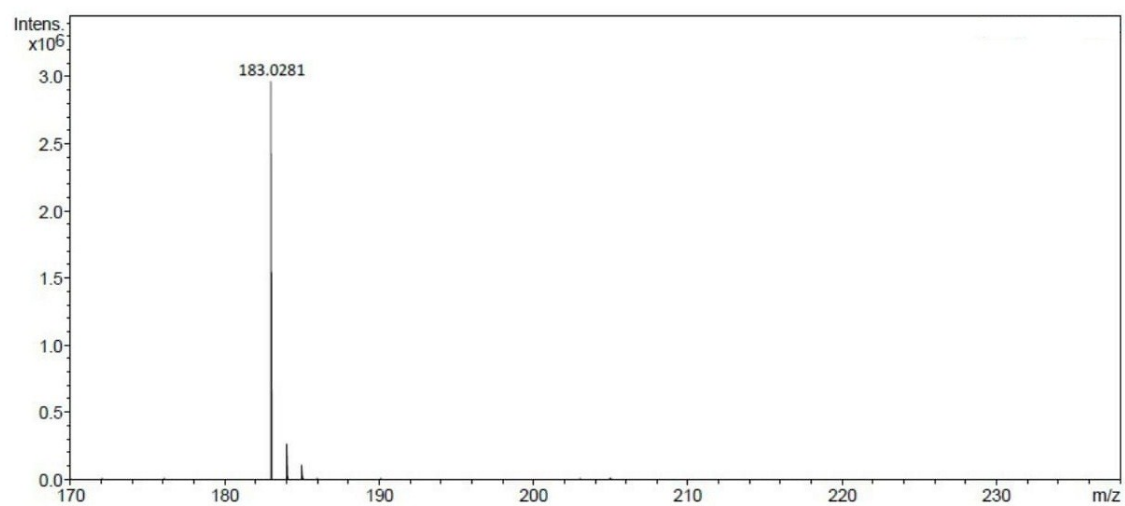

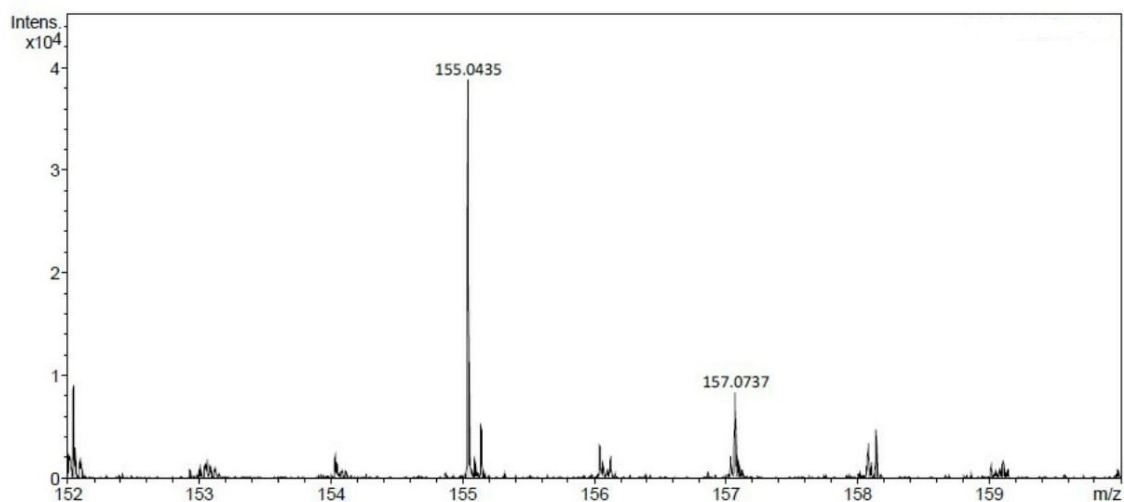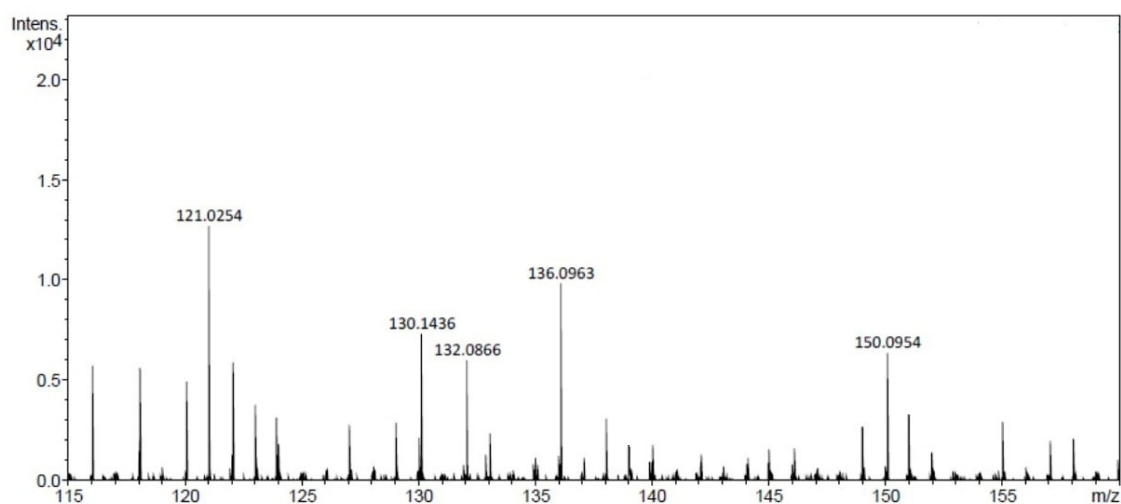

**Figure S10.** Mass spectra of degraded MB solution by NCTG20 composite under visible light

## References

1. D. Volpati, P. H. Aoki, C. A. Dantas, F. V. Paulovich, M. C. F. de Oliveira, O. N. Oliveira Jr, A. Riul Jr, R. F. Aroca and C. J. Constantino, *Langmuir*, 2011, 28, 1029-1040.
